# Supplementary material for: Photophysical properties of a boron analogue of coumarin
Source: Royal Society of Chemistry journal article supplement (doi:10.1039/d1cp02386a), 2021-01-01
Supplement: d1cp02386a1.pdf [file d1cp02386a1.pdf]

# **Photophysical properties of a boron analogue of coumarin**

Huayi Wang<sup>a</sup>, Briana R. Schrage<sup>a</sup>, Kana Takematsu<sup>b</sup>, Christopher J. Ziegler<sup>a</sup>

*a Department of Chemistry, University of Akron, Akron, Ohio 44312-3601, United States*

*b Department of Chemistry, Bowdoin College, Brunswick, Maine 04011, United States*

## **Supplementary Information**

## Table of Contents

|                                                                                                                 | Page |
|-----------------------------------------------------------------------------------------------------------------|------|
| <b>Figure S1:</b> $^1\text{H}$ NMR (300 MHz) of <b>DFBS</b> in $\text{CDCl}_3$ .                                | S3   |
| <b>Figure S2:</b> $^{13}\text{C}$ NMR (300 MHz) of <b>DFBS</b> in $\text{CDCl}_3$ .                             | S3   |
| <b>Figure S3:</b> $^{19}\text{F}$ NMR (300 MHz) of <b>DFBS</b> in $\text{CDCl}_3$ .                             | S4   |
| <b>Figure S4:</b> $^{11}\text{B}$ NMR (400 MHz) of <b>DFBS</b> in $\text{CDCl}_3$ .                             | S4   |
| <b>Figure S5:</b> $^{19}\text{F}$ temp variant NMR (400 MHz) of <b>DFBS</b> in $\text{CDCl}_3$ .                | S5   |
| <b>Figure S6:</b> Structure of <b>DFBS</b> with 35% thermal ellipsoids.                                         | S5   |
| <b>Table S1:</b> X-ray crystal data and structure parameters for <b>DFBS</b> .                                  | S6   |
| <b>Figure S7:</b> Solvent dependent UV-visible spectra for <b>UC</b> and <b>DFBS</b> .                          | S7   |
| <b>Figure S8:</b> Emission spectra of <b>DFBS</b> in DCM.                                                       | S8   |
| <b>Figure S9:</b> Emission spectra of <b>DFBS</b> in acetonitrile.                                              | S8   |
| <b>Figure S10:</b> Emission spectra comparison of <b>DFBS</b> and <b>salicylaldehyde</b> in DCM.                | S9   |
| <b>Figure S11:</b> Solid-state IR spectrum of <b>DFBS</b> .                                                     | S9   |
| <b>Figure S12:</b> Cyclic voltammogram of <b>UC</b> and <b>DFBS</b> in acetonitrile.                            | S10  |
| <b>Figure S13:</b> TDDFT calculated orbitals and orbital energies for <b>UC</b> and <b>DFBS</b> .               | S11  |
| <b>Table S2:</b> TDDFT results for <b>UC</b> , gas phase.                                                       | S12  |
| <b>Table S3:</b> TDDFT results for <b>DFBS</b> , gas phase.                                                     | S13  |
| <b>Table S4:</b> TDDFT results for <b>UC</b> , in DCM.                                                          | S15  |
| <b>Table S5:</b> TDDFT results for <b>DFBS</b> , in DCM.                                                        | S17  |
| <b>Table S6:</b> TDDFT results for <b>UC</b> , in dioxane.                                                      | S18  |
| <b>Table S7:</b> TDDFT results for <b>DFBS</b> , in dioxane.                                                    | S20  |
| <b>Figure S14:</b> TDDFT calculated dipole moment of <b>UC</b> and <b>DFBS</b> .                                | S22  |
| <b>Figure S15:</b> Stability UV-vis spectra of <b>DFBS</b> in DCM.                                              | S22  |
| <b>Figure S16:</b> DFT optimized geometry of <b>DFBS</b> in DCM and dioxane.                                    | S23  |
| <b>Figure S17:</b> Exchange functional comparison for calculated gas phase transition energies of <b>DFBS</b> . | S24  |
| <b>Figure S18:</b> Exchange functional comparison for calculated transition energies of <b>DFBS</b> in DCM.     | S24  |

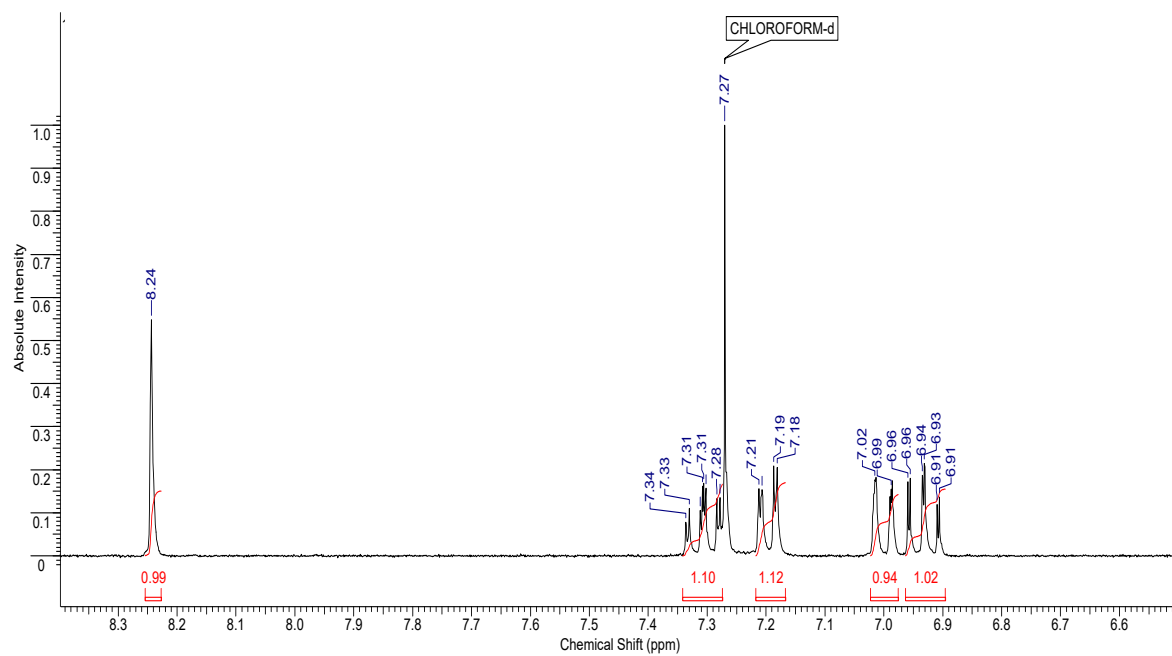

**Figure S1:**  $^1\text{H}$  NMR of DFBS in  $\text{CDCl}_3$ , obtained from a 300 MHz instrument.

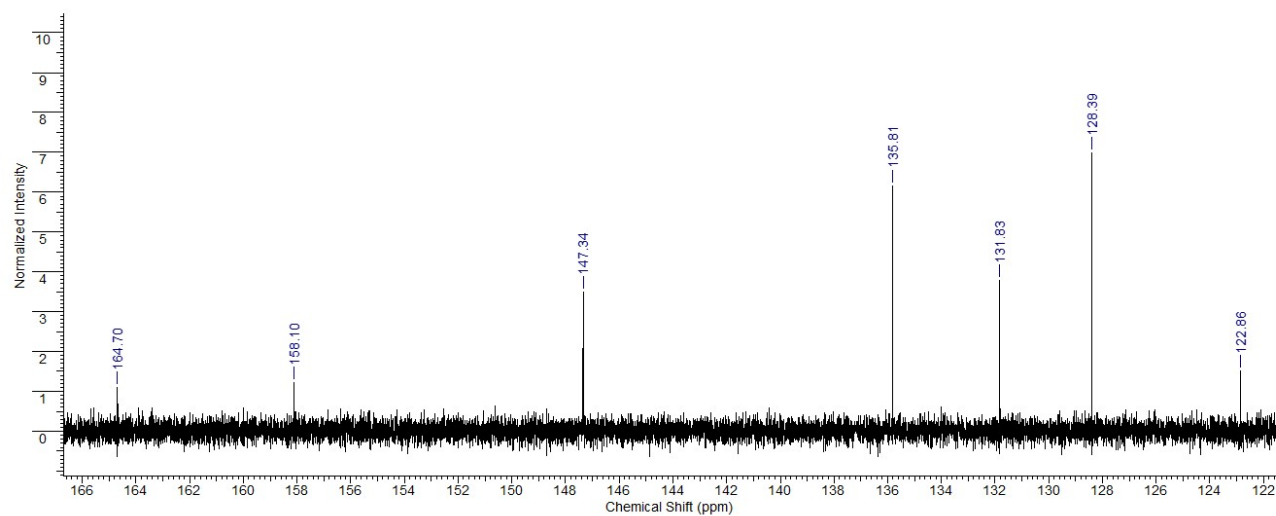

**Figure S2:**  $^{13}\text{C}$  NMR of DFBS in  $\text{CDCl}_3$ , 400 MHz.

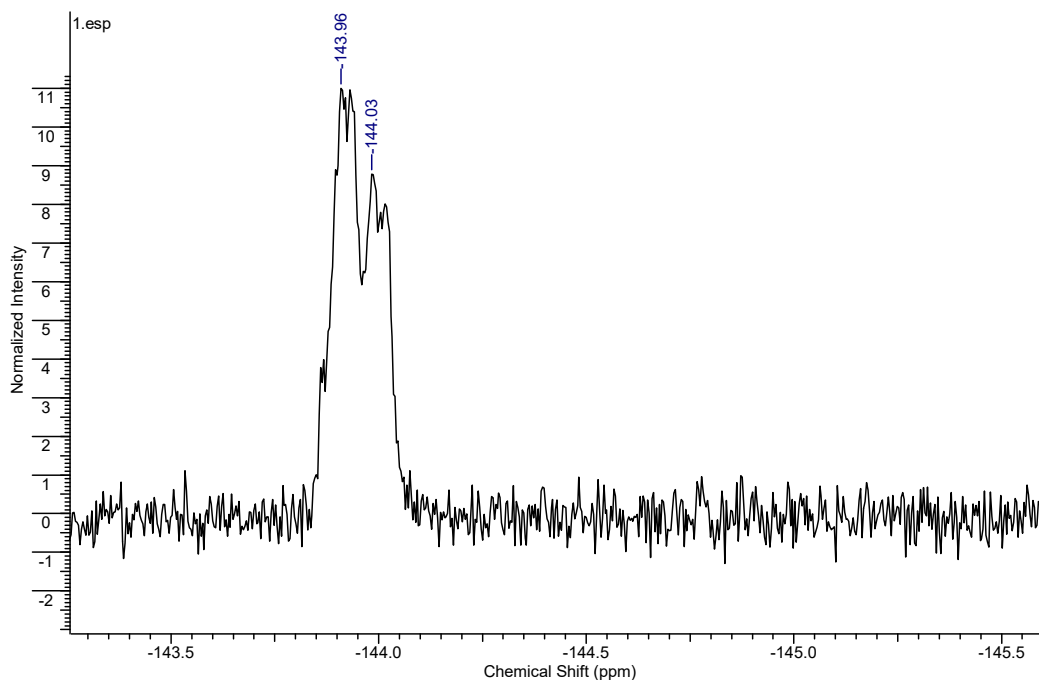

**Figure S3:**  $^{19}\text{F}$  NMR of DFBS in  $\text{CDCl}_3$ , 300 MHz. Internal standard of  $\text{CF}_3\text{OOH}$  (sealed in glass capillary) response at 78.50 ppm.

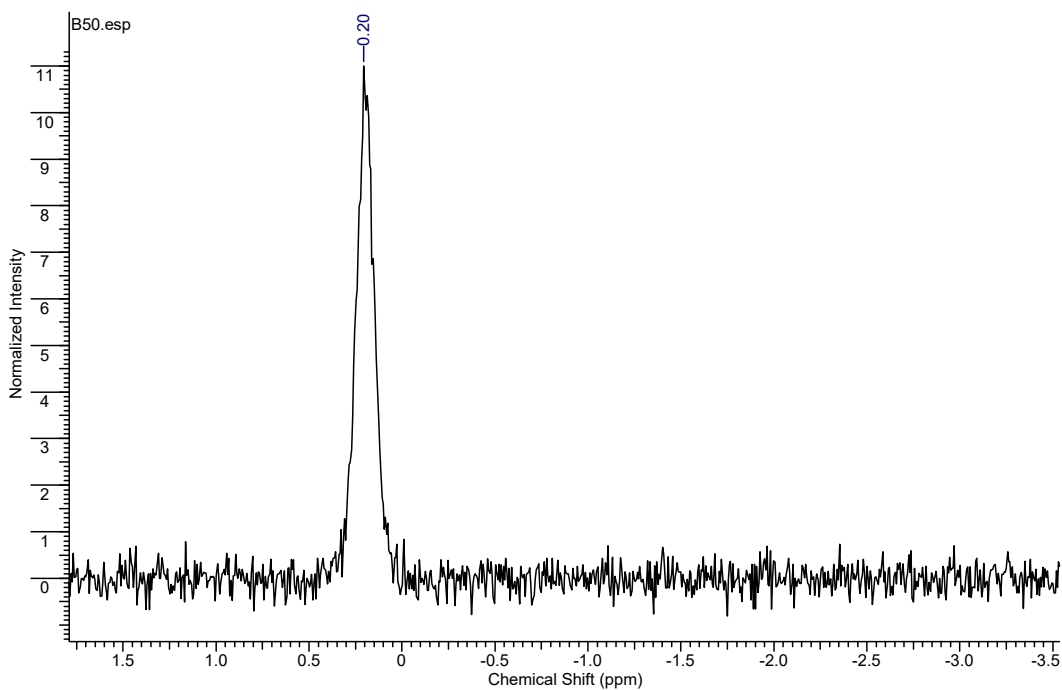

**Figure S4:**  $^{11}\text{B}$  F-decoupled NMR of DFBS in  $\text{CDCl}_3$ , 50°C, 400 MHz.

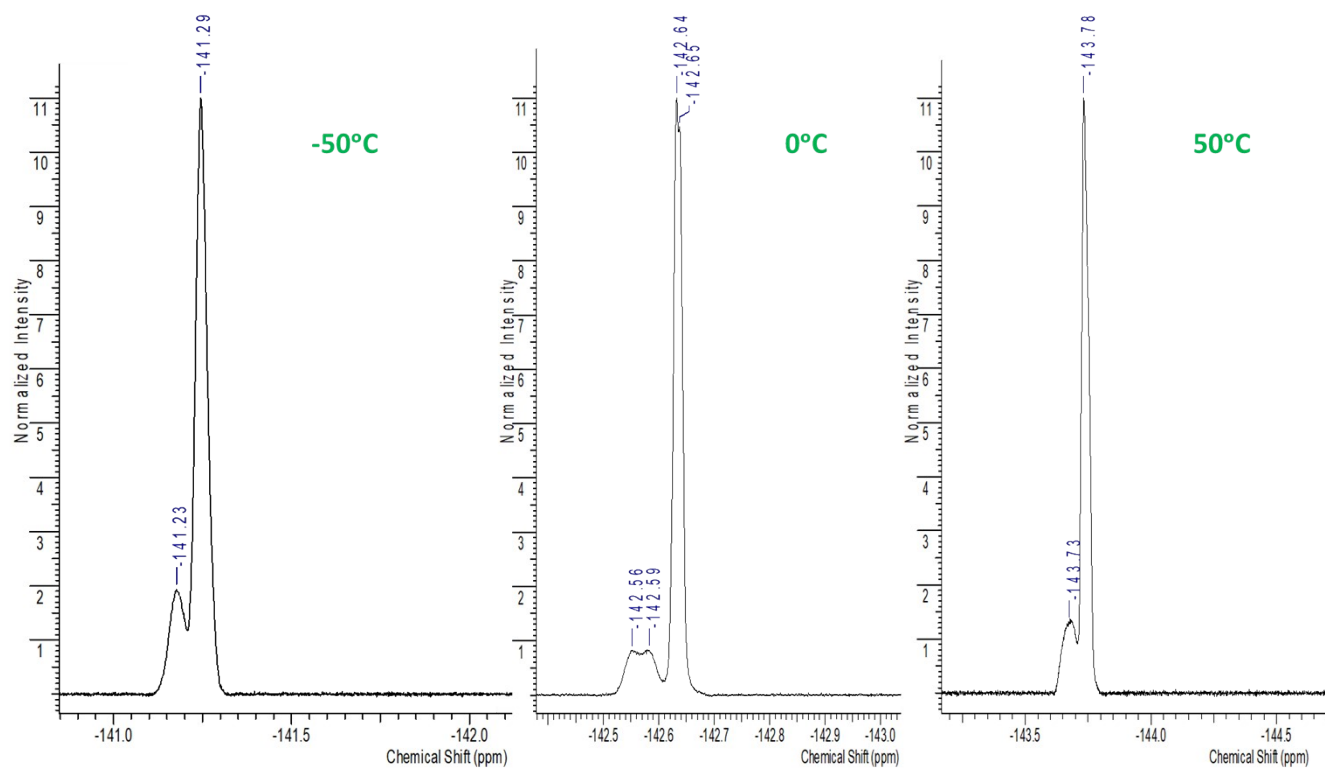

**Figure S5:** Variant temperature  $^{19}\text{F}$  B-decoupled NMR of DFBS in  $\text{CDCl}_3$ , 400 MHz.

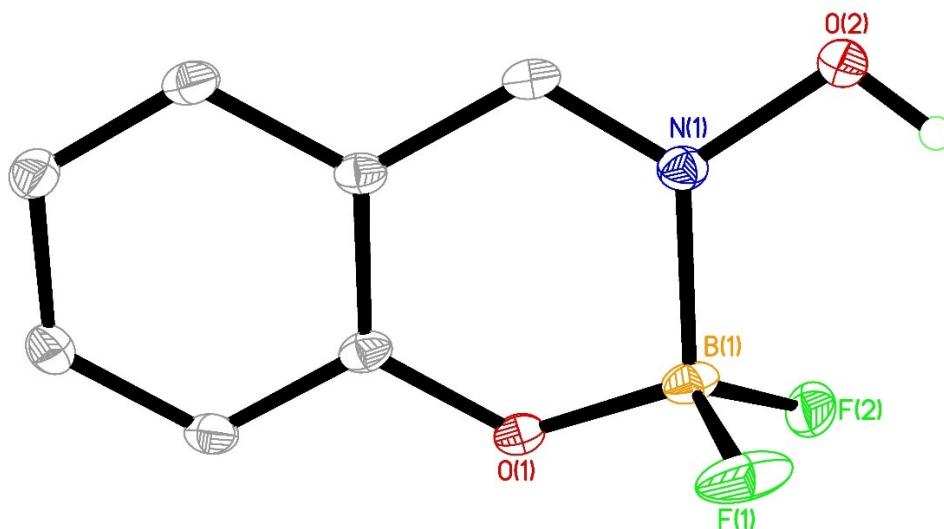

**Figure S6:** Structure of DFBS showing 35% probability ellipsoids.

| <b>Compound</b>                                  | <b>DFBS</b>                                                    |
|--------------------------------------------------|----------------------------------------------------------------|
| CCDC                                             | 2051349                                                        |
| Empirical formula                                | C <sub>9</sub> H <sub>10</sub> BF <sub>2</sub> NO <sub>3</sub> |
| Formula weight                                   | 228.99                                                         |
| Crystal system                                   | Monoclinic                                                     |
| Space group                                      | P2 <sub>1</sub> /c                                             |
| a/ Å                                             | 6.5253(16)                                                     |
| b/ Å                                             | 11.900(3)                                                      |
| c/ Å                                             | 13.029(3)                                                      |
| α(°)                                             | 90                                                             |
| β(°)                                             | 100.248(6)                                                     |
| γ(°)                                             | 90                                                             |
| Volume (Å <sup>3</sup> )                         | 995.6(4)                                                       |
| Z                                                | 4                                                              |
| Dc (Mg/m <sup>3</sup> )                          | 1.528                                                          |
| μ (mm <sup>-1</sup> )                            | 0.135                                                          |
| F(000)                                           | 472                                                            |
| reflns collected                                 | 9395                                                           |
| indep. reflns                                    | 2478                                                           |
| GOF on F <sup>2</sup>                            | 1.054                                                          |
| R1 (on F <sub>o</sub> <sup>2</sup> , I > 2σ(I))  | 0.0428                                                         |
| wR2 (on F <sub>o</sub> <sup>2</sup> , I > 2σ(I)) | 0.0937                                                         |
| R1 (all data)                                    | 0.0661                                                         |
| wR2 (all data)                                   | 0.1042                                                         |

**Table S1:** X-ray crystal data and structure parameters for DFBS.

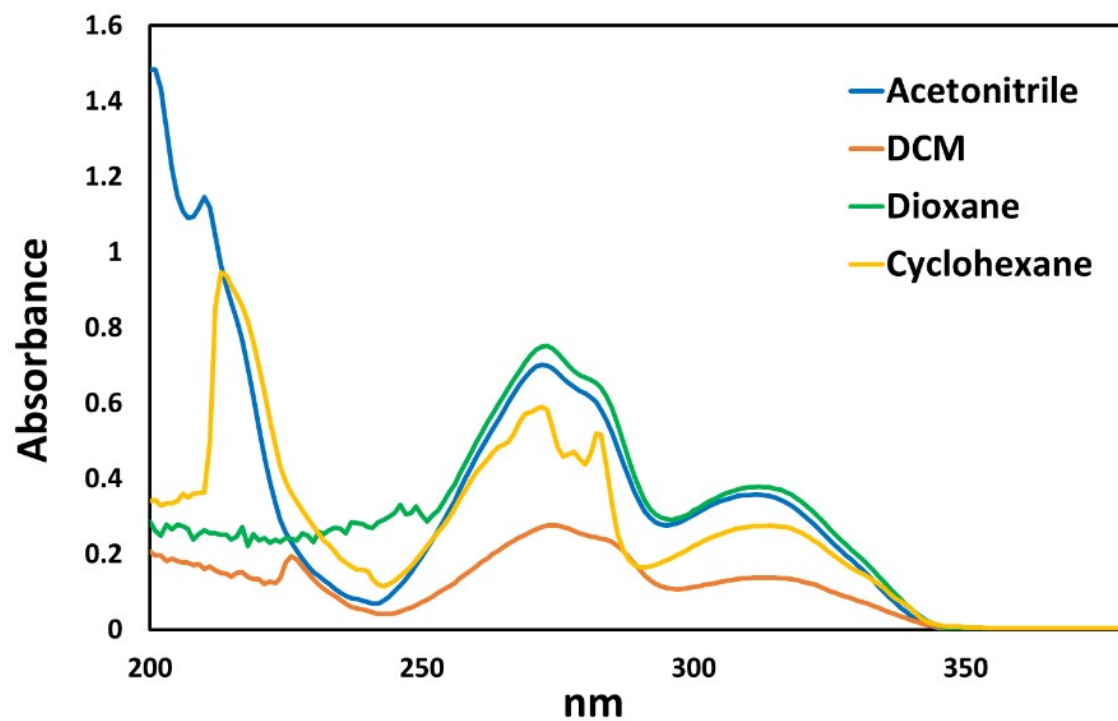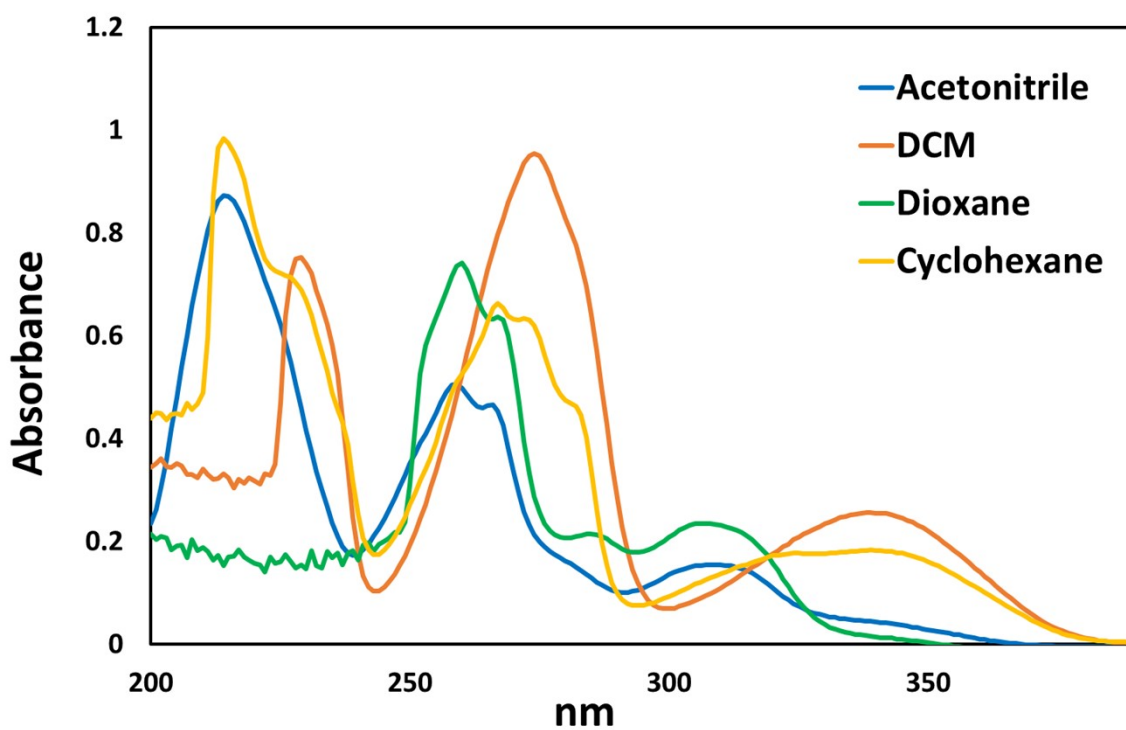

**Figure S7:** (Top) UV visible absorption spectra of unsubstituted coumarin in solvents with variable polarity. (Bottom) UV visible absorption spectra of DFBS in solvents with variable polarity. Solvents were dried with 3 angstrom molecular sieves but 1,4-dioxane could still be wet.

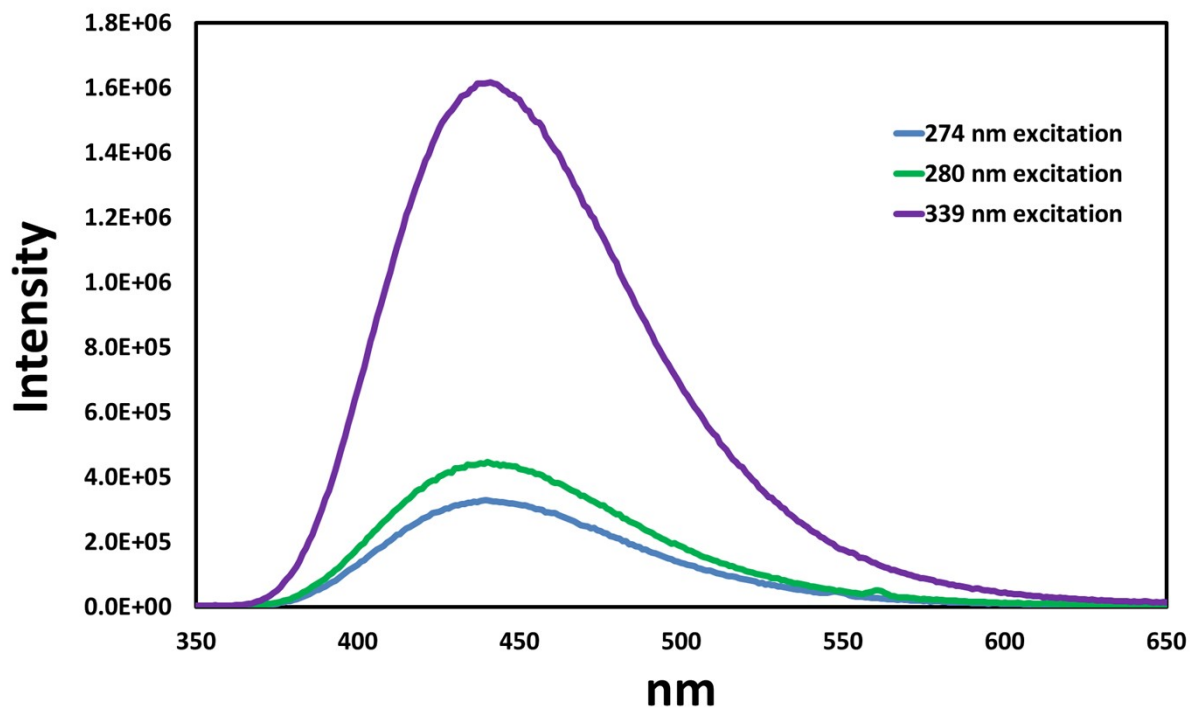

Figure S8: Emission spectra of DFBS in DCM obtained at different excitation wavelengths.

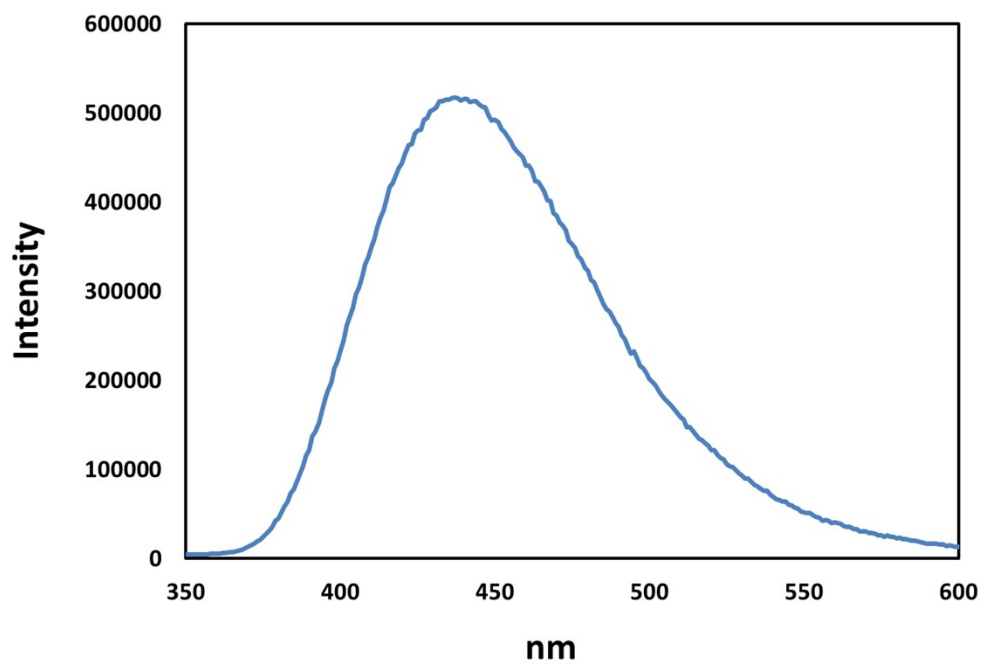

Figure S9: Emission spectra of DFBS in acetonitrile obtained at 313 nm excitation.



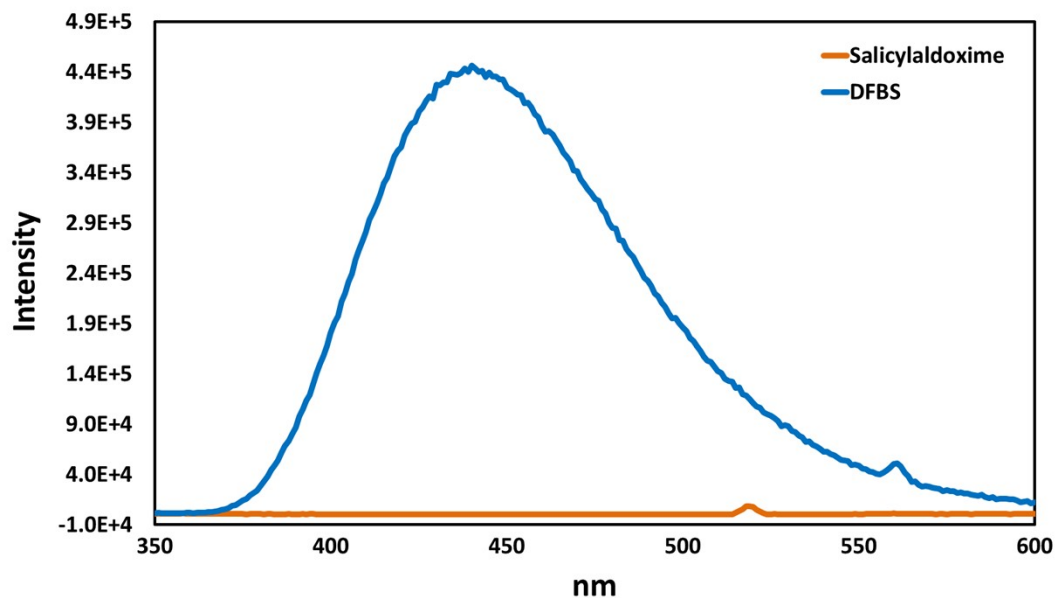

**Figure S10:** Emission spectra of DFBS and salicyldoxime in DCM at 280 nm excitation wavelength. Salicyldoxime is not emissive under the same aprotic solvent conditions as DFBS but low intensity emission is observed for the oxime in protic polar solvent such as methanol. Unsubstituted coumarin also has negligible emission.

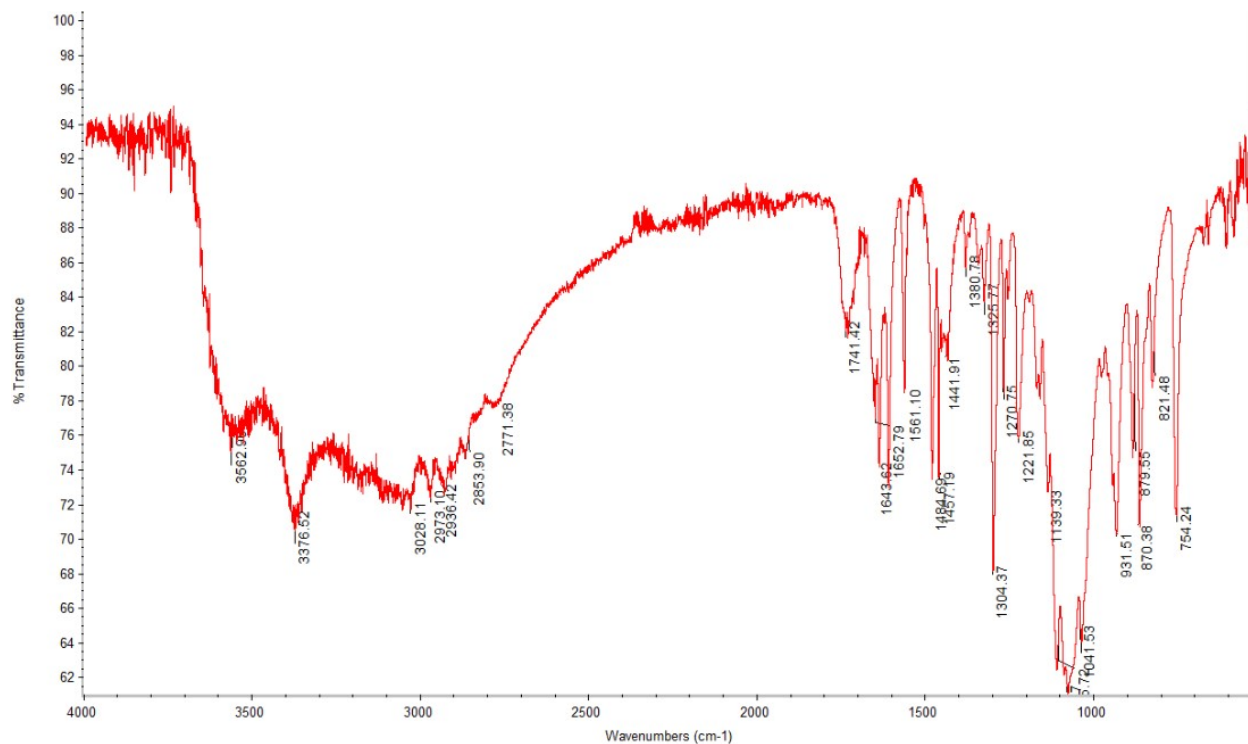

**Figure S11:** Solid-state FT-IR of DFBS.

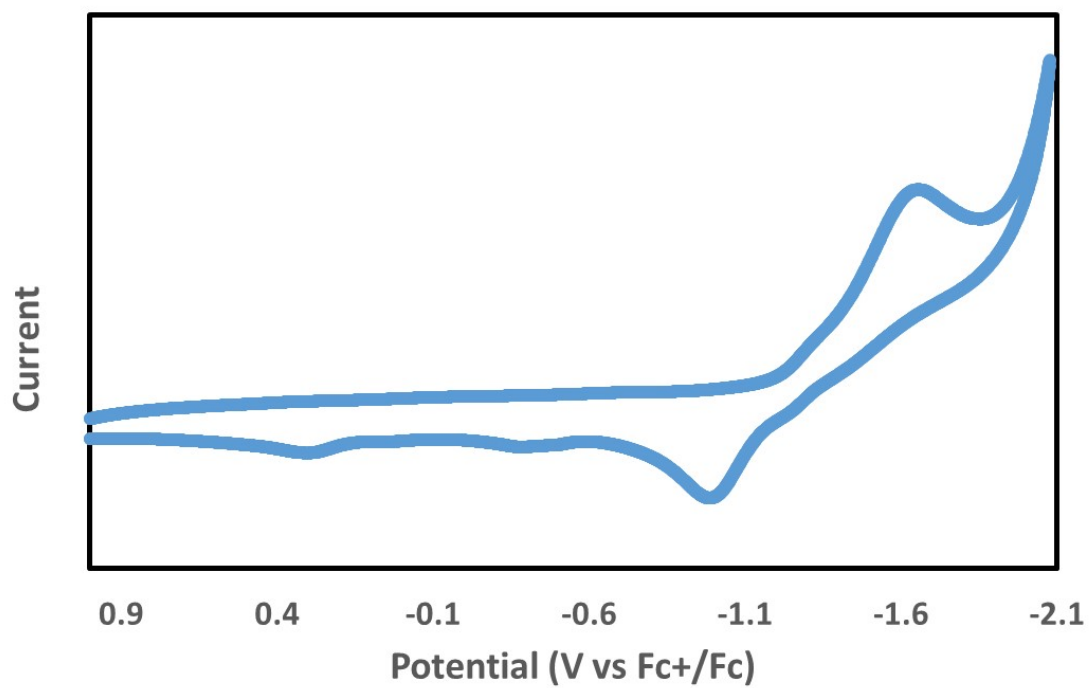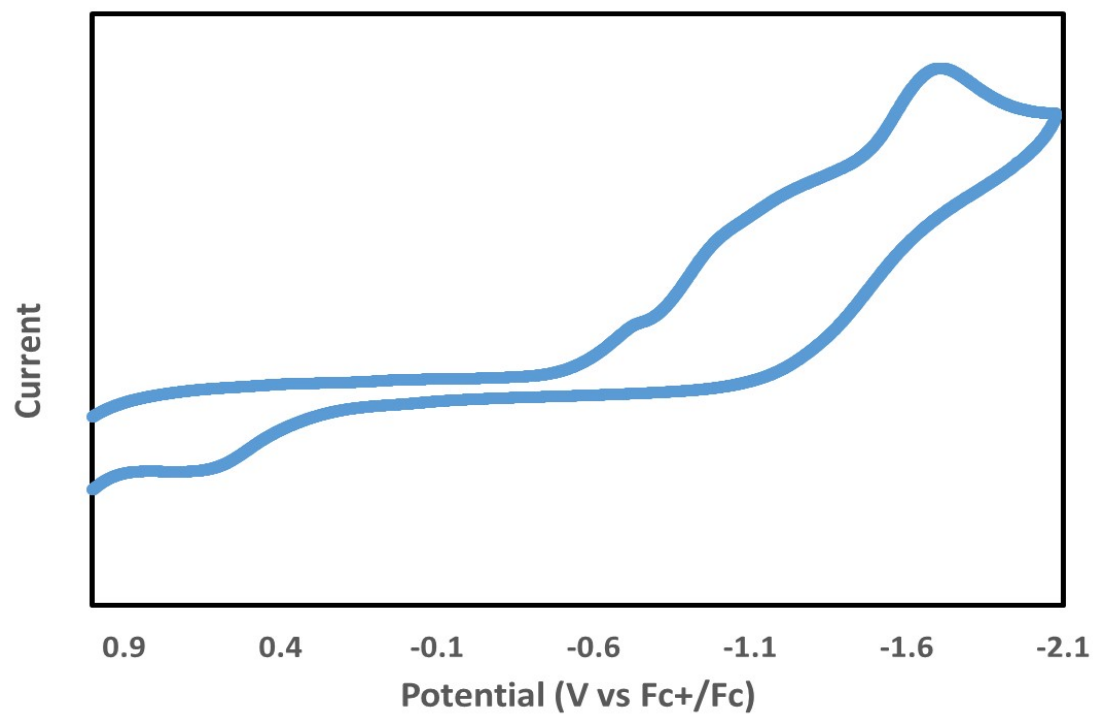

**Figure S12:** (Top) Cyclic voltammogram of coumarin in acetonitrile with 0.1M TBAPF<sub>6</sub>.  
(Bottom) Cyclic voltammogram of DFBS in acetonitrile with 0.1M TBAPF<sub>6</sub>.

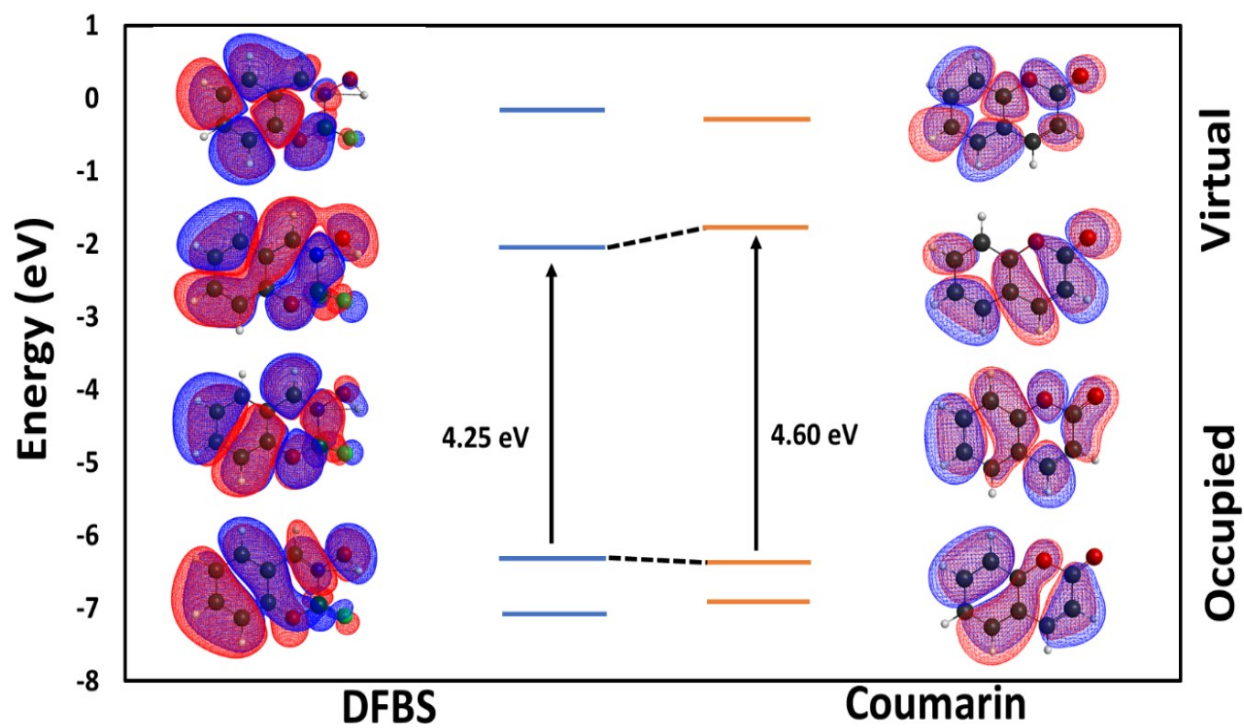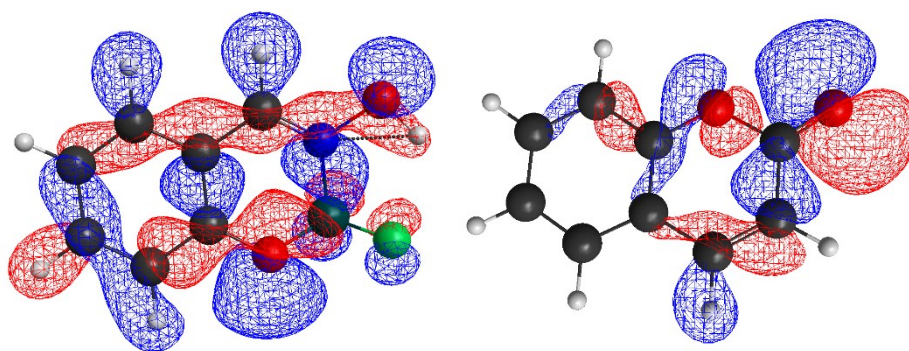

**Figure S13:** (Top) TDDFT calculated relative energies of the frontier orbitals for DFBS and UC along with modelled TDDFT natural orbitals. (Bottom) Left: n-HOMO orbital of DFBS. Right: n-HOMO orbital of unsubstituted coumarin.

**Table S2:** Gas phase TDDFT results for unsubstituted coumarin. Only excited states with  $f > 0.05$  are shown.

| State 1 | Energy      | Oscillator strength | Symmetry of state | OCC I | VIR A | Excitation Amp | De-excitation Amp |
|---------|-------------|---------------------|-------------------|-------|-------|----------------|-------------------|
|         | 4.1772 eV   | 0.111667            | A                 | 37    | 39    | 0.354408       | 0.004618          |
|         | 296.8 nm    |                     |                   | 38    | 39    | -0.910556      | 0.065626          |
|         |             |                     |                   | 35    | 40    | 0.05161        | 0.013919          |
|         |             |                     |                   | 37    | 40    | 0.178439       | 0.033579          |
|         |             |                     |                   | 38    | 40    | 0.068477       | 0.013547          |
|         |             |                     |                   | 33    | 41    | -0.037418      | -0.019955         |
|         |             |                     |                   | 33    | 43    | 0.033475       | 0.017477          |
|         |             |                     |                   | 36    | 48    | 0.032347       | 0.013916          |
| State 3 | Energy      | Oscillator strength | Symmetry of state | OCC I | VIR A | Excitation Amp | De-excitation Amp |
|         | 4.6751 eV   | 0.152607            | A                 | 33    | 39    | 0.059764       | 0.013372          |
|         | 265.2 nm    |                     |                   | 37    | 39    | 0.866344       | -0.045717         |
|         |             |                     |                   | 38    | 39    | 0.35762        | -0.052224         |
|         |             |                     |                   | 33    | 40    | 0.051281       | 0.015383          |
|         |             |                     |                   | 38    | 40    | 0.31527        | 0.015745          |
|         |             |                     |                   | 37    | 41    | -0.113472      | -0.019982         |
| State 5 | Energy      | Oscillator strength | Symmetry of state | OCC I | VIR A | Excitation Amp | De-excitation Amp |
|         | 5.882664 eV | 0.083778            | A                 | 30    | 39    | 0.067829       | 0.008396          |
|         | 210.7 nm    |                     |                   | 33    | 39    | 0.032325       | 0.000274          |
|         |             |                     |                   | 35    | 39    | 0.501329       | 0.008791          |
|         |             |                     |                   | 37    | 39    | 0.091899       | -0.018156         |
|         |             |                     |                   | 35    | 40    | 0.073208       | 0.010799          |
|         |             |                     |                   | 37    | 40    | 0.077004       | -0.004198         |
|         |             |                     |                   | 38    | 40    | -0.423353      | 0.03225           |
|         |             |                     |                   | 37    | 41    | -0.226993      | -0.009112         |
|         |             |                     |                   | 38    | 41    | -0.698371      | 0.017743          |

**Table S3:** Gas phase TDDFT results for DFBS. Only excited states with  $f > 0.05$  are shown.

| State 1 | Energy      | Oscillator strength | Symmetry of state | OCC I | VIR A | Excitation Amp | De-excitation Amp |
|---------|-------------|---------------------|-------------------|-------|-------|----------------|-------------------|
|         | 3.736489 eV | 0.06977             | A                 | 46    | 48    | 0.211256       | 0.014231          |
|         | 331.80 nm   |                     |                   | 47    | 48    | -0.965896      | 0.066795          |
|         |             |                     |                   | 44    | 49    | 0.038122       | 0.013032          |
|         |             |                     |                   | 46    | 49    | 0.130202       | 0.038774          |
|         |             |                     |                   | 47    | 49    | 0.045874       | 0.010349          |
|         |             |                     |                   | 47    | 50    | 0.048843       | 0.017276          |
| State 2 | Energy      | Oscillator strength | Symmetry of state | OCC I | VIR A | Excitation Amp | De-excitation Amp |
|         | 4.713108 eV | 0.273923            | A                 | 43    | 48    | -0.049723      | -0.00273          |
|         | 263.10 nm   |                     |                   | 44    | 48    | -0.035847      | -0.011441         |
|         |             |                     |                   | 45    | 48    | -0.035405      | -0.003531         |
|         |             |                     |                   | 46    | 48    | -0.930859      | 0.078746          |
|         |             |                     |                   | 47    | 48    | -0.227883      | 0.050798          |
|         |             |                     |                   | 46    | 49    | -0.073251      | -0.00657          |
|         |             |                     |                   | 47    | 49    | -0.24427       | -0.011715         |
|         |             |                     |                   | 46    | 50    | 0.045796       | 0.008309          |
|         |             |                     |                   | 47    | 50    | -0.0793        | -0.017287         |
| State 4 | Energy      | Oscillator strength | Symmetry of state | OCC I | VIR A | Excitation Amp | De-excitation Amp |
|         | 5.67612 eV  | 0.082521            | A                 | 44    | 48    | 0.129915       | 0.004676          |
|         | 218.40 nm   |                     |                   | 46    | 48    | -0.188191      | 0.031459          |
|         |             |                     |                   | 44    | 49    | 0.043942       | -0.002502         |
|         |             |                     |                   | 46    | 49    | 0.326462       | 0.010416          |
|         |             |                     |                   | 47    | 49    | 0.758623       | -0.04214          |
|         |             |                     |                   | 46    | 50    | 0.222201       | 0.020779          |
|         |             |                     |                   | 47    | 50    | -0.458612      | -0.011453         |
| State 5 | Energy      | Oscillator strength | Symmetry of state | OCC I | VIR A | Excitation Amp | De-excitation Amp |
|         | 6.102842 eV | 0.08378             | A                 | 39    | 48    | 0.032554       | 0.002705          |
|         | 203.20 nm   |                     |                   | 41    | 48    | 0.084388       | 0.004518          |
|         |             |                     |                   | 43    | 48    | 0.484619       | 0.007492          |
|         |             |                     |                   | 44    | 48    | -0.563212      | 0.0193            |
|         |             |                     |                   | 45    | 48    | -0.078696      | 0.001997          |
|         |             |                     |                   | 46    | 48    | 0.052148       | -0.020234         |
|         |             |                     |                   | 47    | 48    | 0.042539       | -0.019744         |
|         |             |                     |                   | 45    | 49    | 0.033543       | 0.001727          |
|         |             |                     |                   | 46    | 49    | 0.496549       | -0.014303         |

|  |  |  |  |    |    |           |          |
|--|--|--|--|----|----|-----------|----------|
|  |  |  |  | 47 | 49 | -0.30084  | 0.027004 |
|  |  |  |  | 46 | 50 | 0.121254  | 0.010544 |
|  |  |  |  | 47 | 50 | -0.262814 | 0.009134 |

**Table S4:** TDDFT calculated results for unsubstituted coumarin in dichloromethane. Only excited states with  $f > 0.05$  and energy  $> 200$  nm are shown.

| State 1 | Energy      | Oscillator strength | Symmetry of state | OCC I | VIR A | Excitation Amp | De-excitation Amp |
|---------|-------------|---------------------|-------------------|-------|-------|----------------|-------------------|
|         | 4.094564 eV | 0.287024            | A                 | 35    | 39    | -0.03021       | -0.01099          |
|         | 302.80 nm   |                     |                   | 37    | 39    | -0.23592       | -0.00496          |
|         |             |                     |                   | 38    | 39    | 0.958331       | -0.05774          |
|         |             |                     |                   | 35    | 40    | -0.03513       | -0.00986          |
|         |             |                     |                   | 37    | 40    | 0.122156       | 0.02721           |
|         |             |                     |                   | 38    | 40    | 0.058278       | 0.012644          |
| State 2 | Energy      | Oscillator strength | Symmetry of state | OCC I | VIR A | Excitation Amp | De-excitation Amp |
|         | 4.48237 eV  | 0.249067            | A                 | 33    | 39    | 0.041058       | 0.01072           |
|         | 276.60 nm   |                     |                   | 37    | 39    | -0.93782       | 0.03717           |
|         |             |                     |                   | 38    | 39    | -0.24698       | 0.031707          |
|         |             |                     |                   | 33    | 40    | -0.03388       | -0.01096          |
|         |             |                     |                   | 35    | 40    | -0.03546       | -0.01042          |
|         |             |                     |                   | 37    | 40    | 0.040418       | 0.000806          |
|         |             |                     |                   | 38    | 40    | 0.210603       | 0.019379          |
|         |             |                     |                   | 37    | 41    | -0.07876       | -0.01828          |
|         |             |                     |                   | 38    | 41    | -0.0367        | 0.000706          |
| State 5 | Energy      | Oscillator strength | Symmetry of state | OCC I | VIR A | Excitation Amp | De-excitation Amp |
|         | 5.825154 eV | 0.206623            | A                 | 30    | 39    | 0.064164       | 0.009333          |
|         | 212.84 nm   |                     |                   | 33    | 39    | -0.04269       | -0.00055          |
|         |             |                     |                   | 35    | 39    | -0.36973       | -0.00839          |
|         |             |                     |                   | 37    | 39    | 0.058296       | -0.01498          |
|         |             |                     |                   | 35    | 40    | 0.065404       | 0.010496          |
|         |             |                     |                   | 37    | 40    | -0.25137       | 0.008336          |
|         |             |                     |                   | 38    | 40    | 0.541971       | -0.03585          |
|         |             |                     |                   | 37    | 41    | 0.097327       | 0.006123          |
|         |             |                     |                   | 38    | 41    | 0.691661       | -0.01318          |
| State 6 | Energy      | Oscillator strength | Symmetry of state | OCC I | VIR A | Excitation Amp | De-excitation Amp |
|         | 6.081462 eV | 0.47002             | A                 | 33    | 39    | -0.11447       | -0.00932          |
|         | 203.87 nm   |                     |                   | 35    | 39    | 0.591119       | -0.00705          |
|         |             |                     |                   | 37    | 39    | 0.064006       | -0.01868          |
|         |             |                     |                   | 38    | 39    | 0.09226        | -0.03142          |
|         |             |                     |                   | 37    | 40    | -0.63416       | 0.033645          |
|         |             |                     |                   | 38    | 40    | 0.376952       | -0.03584          |

|  |  |  |  |    |    |          |          |
|--|--|--|--|----|----|----------|----------|
|  |  |  |  | 35 | 41 | -0.06478 | -0.01158 |
|  |  |  |  | 37 | 41 | -0.1646  | -0.00143 |
|  |  |  |  | 38 | 41 | -0.2094  | 0.004545 |



**Table S5:** TDDFT calculated results for DFBS in dichloromethane. Only excited states with  $f > 0.05$  and energy  $> 200$  nm are shown.

| State 1 | Energy      | Oscillator strength | Symmetry of state | OCC I | VIR A | Excitation Amp | De-excitation Amp |
|---------|-------------|---------------------|-------------------|-------|-------|----------------|-------------------|
|         | 3.591382 eV | 0.116144            | A                 | 46    | 48    | 0.112375       | 0.012728          |
|         | 345.23 nm   |                     |                   | 47    | 48    | -0.98708       | 0.056741          |
|         |             |                     |                   | 46    | 49    | 0.100593       | 0.036432          |
|         |             |                     |                   | 47    | 49    | 0.043676       | 0.009664          |
|         |             |                     |                   | 47    | 50    | -0.03093       | -0.01489          |
| State 2 | Energy      | Oscillator strength | Symmetry of state | OCC I | VIR A | Excitation Amp | De-excitation Amp |
|         | 4.563929 eV | 0.480295            | A                 | 42    | 48    | 0.041489       | 0.008235          |
|         | 271.66 nm   |                     |                   | 45    | 48    | 0.060251       | 0.000853          |
|         |             |                     |                   | 46    | 48    | 0.975104       | -0.06516          |
|         |             |                     |                   | 47    | 48    | 0.123279       | -0.02936          |
|         |             |                     |                   | 46    | 49    | 0.072624       | 0.009003          |
|         |             |                     |                   | 47    | 49    | 0.126535       | 0.011774          |
|         |             |                     |                   | 46    | 50    | 0.034008       | 0.008914          |
|         |             |                     |                   | 47    | 50    | -0.04659       | -0.01504          |
| State 4 | Energy      | Oscillator strength | Symmetry of state | OCC I | VIR A | Excitation Amp | De-excitation Amp |
|         | 5.722493 eV | 0.186849            | A                 | 41    | 48    | 0.032215       | 0.004261          |
|         | 216.66 nm   |                     |                   | 44    | 48    | 0.186537       | 0.005727          |
|         |             |                     |                   | 46    | 48    | 0.113759       | -0.02187          |
|         |             |                     |                   | 47    | 48    | -0.04545       | 0.012534          |
|         |             |                     |                   | 46    | 49    | -0.23922       | -0.01036          |
|         |             |                     |                   | 47    | 49    | -0.86832       | 0.046992          |
|         |             |                     |                   | 46    | 50    | 0.173655       | 0.019779          |
|         |             |                     |                   | 47    | 50    | -0.31883       | -0.01093          |
| State 6 | Energy      | Oscillator strength | Symmetry of state | OCC I | VIR A | Excitation Amp | De-excitation Amp |
|         | 6.097662 eV | 0.111128            | A                 | 41    | 48    | -0.03902       | 0.001506          |
|         | 203.33 nm   |                     |                   | 43    | 48    | 0.610951       | -0.00033          |
|         |             |                     |                   | 44    | 48    | -0.16733       | 0.000534          |
|         |             |                     |                   | 44    | 49    | 0.034787       | 0.003524          |
|         |             |                     |                   | 46    | 49    | -0.53761       | 0.005461          |
|         |             |                     |                   | 47    | 49    | 0.281488       | -0.02433          |
|         |             |                     |                   | 46    | 50    | 0.06795        | 0.004842          |
|         |             |                     |                   | 47    | 50    | -0.46551       | 0.005166          |

**Table S6:** TDDFT calculated results for unsubstituted coumarin in dioxane. Only excited states with  $f > 0.05$  and energy  $> 200$  nm are shown.

| State 1 | Energy      | Oscillator strength | Symmetry of state | OCC I | VIR A | Excitation Amp | De-excitation Amp |
|---------|-------------|---------------------|-------------------|-------|-------|----------------|-------------------|
|         | 4.14497 eV  | 0.186901            | A                 | 36    | 39    | -0.03572       | -0.00017          |
|         | 299.12 nm   |                     |                   | 37    | 39    | -0.30591       | -0.00477          |
|         |             |                     |                   | 38    | 39    | 0.933035       | -0.06219          |
|         |             |                     |                   | 35    | 40    | -0.04344       | -0.01194          |
|         |             |                     |                   | 37    | 40    | -0.14981       | -0.03026          |
|         |             |                     |                   | 38    | 40    | -0.06283       | -0.01312          |
|         |             |                     |                   | 33    | 41    | 0.031472       | 0.01775           |
|         |             |                     |                   | 38    | 41    | -0.03077       | -0.00455          |
|         |             |                     |                   | 33    | 42    | -0.03034       | -0.01626          |
| State 3 | Energy      | Oscillator strength | Symmetry of state | OCC I | VIR A | Excitation Amp | De-excitation Amp |
|         | 4.579997 eV | 0.20811             | A                 | 33    | 39    | -0.0493        | -0.01194          |
|         | 270.71 nm   |                     |                   | 36    | 39    | -0.07372       | 0.00115           |
|         |             |                     |                   | 37    | 39    | 0.901424       | -0.04085          |
|         |             |                     |                   | 38    | 39    | 0.311258       | -0.04223          |
|         |             |                     |                   | 33    | 40    | -0.04115       | -0.01286          |
|         |             |                     |                   | 35    | 40    | 0.034762       | 0.009391          |
|         |             |                     |                   | 38    | 40    | 0.260885       | 0.01805           |
|         |             |                     |                   | 37    | 41    | 0.093113       | 0.019022          |
| State 5 | Energy      | Oscillator strength | Symmetry of state | OCC I | VIR A | Excitation Amp | De-excitation Amp |
|         | 5.852769 eV | 0.134049            | A                 | 30    | 39    | 0.066208       | 0.008856          |
|         | 211.84 nm   |                     |                   | 33    | 39    | 0.035665       | 0.000295          |
|         |             |                     |                   | 35    | 39    | -0.44103       | -0.00907          |
|         |             |                     |                   | 37    | 39    | -0.07235       | 0.016046          |
|         |             |                     |                   | 35    | 40    | -0.07014       | -0.01057          |
|         |             |                     |                   | 37    | 40    | -0.16474       | 0.006277          |
|         |             |                     |                   | 38    | 40    | 0.468607       | -0.03342          |
|         |             |                     |                   | 37    | 41    | -0.15251       | -0.00747          |
|         |             |                     |                   | 38    | 41    | -0.71729       | 0.015906          |
| State 6 | Energy      | Oscillator strength | Symmetry of state | OCC I | VIR A | Excitation Amp | De-excitation Amp |
|         | 6.142483 eV | 0.331482            | A                 | 33    | 39    | -0.10952       | -0.0088           |
|         | 201.85 nm   |                     |                   | 34    | 39    | -0.19349       | -4.5E-05          |
|         |             |                     |                   | 35    | 39    | -0.50511       | 0.008745          |
|         |             |                     |                   | 36    | 39    | 0.068977       | 0.001844          |

|         |             |                     |                   |       |       |                |                   |
|---------|-------------|---------------------|-------------------|-------|-------|----------------|-------------------|
|         |             |                     |                   | 37    | 39    | 0.074991       | -0.0195           |
|         |             |                     |                   | 38    | 39    | 0.108257       | -0.03523          |
|         |             |                     |                   | 35    | 40    | 0.032859       | 0.006864          |
|         |             |                     |                   | 36    | 40    | 0.335455       | -0.00059          |
|         |             |                     |                   | 37    | 40    | 0.580228       | -0.03332          |
|         |             |                     |                   | 38    | 40    | -0.37426       | 0.037452          |
|         |             |                     |                   | 35    | 41    | 0.064706       | 0.010599          |
|         |             |                     |                   | 36    | 41    | -0.22496       | 0.002346          |
|         |             |                     |                   | 37    | 41    | -0.10046       | -0.00072          |
|         |             |                     |                   | 38    | 41    | -0.07781       | -0.00102          |
|         |             |                     |                   | 36    | 42    | 0.080153       | -0.00235          |
| State 7 | Energy      | Oscillator strength | Symmetry of state | OCC I | VIR A | Excitation Amp | De-excitation Amp |
|         | 6.158439 eV | 0.084608            | A                 | 31    | 39    | 0.036124       | -0.00136          |
|         | 201.32 nm   |                     |                   | 33    | 39    | -0.11552       | -0.00482          |
|         |             |                     |                   | 34    | 39    | 0.296278       | -0.00369          |
|         |             |                     |                   | 35    | 39    | -0.27178       | 0.005508          |
|         |             |                     |                   | 36    | 39    | -0.12863       | -0.00428          |
|         |             |                     |                   | 37    | 39    | 0.033511       | -0.01002          |
|         |             |                     |                   | 38    | 39    | 0.053828       | -0.01733          |
|         |             |                     |                   | 34    | 40    | 0.034083       | 0.000527          |
|         |             |                     |                   | 36    | 40    | -0.66834       | 0.003135          |
|         |             |                     |                   | 37    | 40    | 0.286977       | -0.01699          |
|         |             |                     |                   | 38    | 40    | -0.19397       | 0.019705          |
|         |             |                     |                   | 35    | 41    | 0.033099       | 0.005338          |
|         |             |                     |                   | 36    | 41    | 0.450935       | -0.00452          |
|         |             |                     |                   | 36    | 42    | -0.15836       | 0.003847          |

**Table S7:** TDDFT calculated results for DFBS in dioxane. Only excited states with  $f > 0.05$  and energy  $> 200$  nm are shown.

| State 1 | Energy      | Oscillator strength | Symmetry of state | OCC I | VIR A | Excitation Amp | De-excitation Amp |
|---------|-------------|---------------------|-------------------|-------|-------|----------------|-------------------|
|         | 3.643339 eV | 0.095428            | A                 | 46    | 48    | -0.15508       | -0.01387          |
|         | 340.30 nm   |                     |                   | 47    | 48    | 0.979489       | -0.06201          |
|         |             |                     |                   | 46    | 49    | 0.111594       | 0.037229          |
|         |             |                     |                   | 47    | 49    | 0.043485       | 0.009982          |
|         |             |                     |                   | 47    | 50    | -0.03926       | -0.01596          |
| State 2 | Energy      | Oscillator strength | Symmetry of state | OCC I | VIR A | Excitation Amp | De-excitation Amp |
|         | 4.61006 eV  | 0.386304            | A                 | 36    | 48    | 0.03087        | 0.01024           |
|         | 268.94 nm   |                     |                   | 41    | 48    | -0.03881       | -0.00759          |
|         |             |                     |                   | 43    | 48    | 0.034671       | 0.00135           |
|         |             |                     |                   | 45    | 48    | 0.042129       | -0.00125          |
|         |             |                     |                   | 46    | 48    | 0.959492       | -0.07228          |
|         |             |                     |                   | 47    | 48    | 0.168926       | -0.03877          |
|         |             |                     |                   | 46    | 49    | -0.07759       | -0.00849          |
|         |             |                     |                   | 47    | 49    | -0.17758       | -0.01222          |
|         |             |                     |                   | 46    | 50    | -0.03704       | -0.00785          |
|         |             |                     |                   | 47    | 50    | 0.062294       | 0.016976          |
| State 4 | Energy      | Oscillator strength | Symmetry of state | OCC I | VIR A | Excitation Amp | De-excitation Amp |
|         | 5.68917 eV  | 0.139249            | A                 | 44    | 48    | -0.16748       | -0.00445          |
|         | 217.93 nm   |                     |                   | 46    | 48    | 0.153517       | -0.02736          |
|         |             |                     |                   | 47    | 48    | -0.03564       | 0.010082          |
|         |             |                     |                   | 44    | 49    | 0.039734       | -0.0021           |
|         |             |                     |                   | 46    | 49    | 0.278522       | 0.010875          |
|         |             |                     |                   | 47    | 49    | 0.827266       | -0.04524          |
|         |             |                     |                   | 46    | 50    | -0.19303       | -0.02014          |
|         |             |                     |                   | 47    | 50    | 0.376275       | 0.011799          |
| State 6 | Energy      | Oscillator strength | Symmetry of state | OCC I | VIR A | Excitation Amp | De-excitation Amp |
|         | 6.157454 eV | 0.108838            | A                 | 36    | 48    | -0.03612       | -0.00117          |
|         | 201.36 nm   |                     |                   | 40    | 48    | -0.0554        | -0.00014          |
|         |             |                     |                   | 41    | 48    | 0.144268       | 0.002603          |
|         |             |                     |                   | 42    | 48    | 0.066343       | -6.9E-05          |
|         |             |                     |                   | 43    | 48    | 0.564492       | -0.00329          |
|         |             |                     |                   | 44    | 48    | 0.428162       | -0.0186           |
|         |             |                     |                   | 45    | 48    | -0.1243        | 0.010335          |

|  |  |  |  |    |    |          |          |
|--|--|--|--|----|----|----------|----------|
|  |  |  |  | 46 | 48 | 0.038292 | -0.01323 |
|  |  |  |  | 44 | 49 | -0.03045 | -0.00171 |
|  |  |  |  | 45 | 49 | 0.038603 | 0.002488 |
|  |  |  |  | 46 | 49 | -0.39414 | 0.008398 |
|  |  |  |  | 47 | 49 | 0.349765 | -0.03634 |
|  |  |  |  | 46 | 50 | -0.12064 | -0.01361 |
|  |  |  |  | 47 | 50 | -0.38193 | 0.00523  |

|           | Dipole moment (Debye)  |          |
|-----------|------------------------|----------|
|           | Unsubstituted Coumarin | DFBS     |
| Gas Phase | 4.795488               | 4.573199 |
| Dioxane   | 5.553159               | 6.058899 |
| DCM       | 6.239841               | 7.898987 |

**Figure S14:** TDDFT calculated dipole moment comparison of UC and DFBS in gas phase, dichloromethane, and 1,4-dioxane.

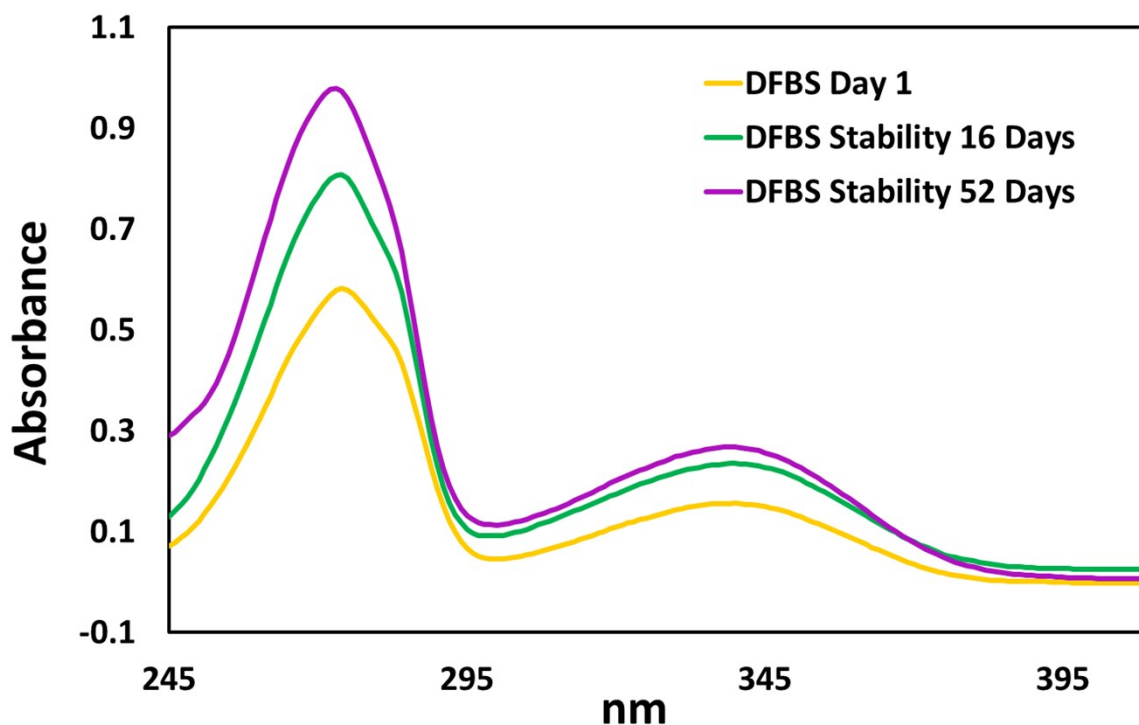

**Figure S15:** Stability results of DFBS dissolved in DCM. A control solution of DFBS dissolved in DCM was kept in a capped volumetric flask at room temperature and ambient conditions without extra precautions from light or moisture. Solution was tested periodically via UV-vis absorption for any degradation of DFBS.

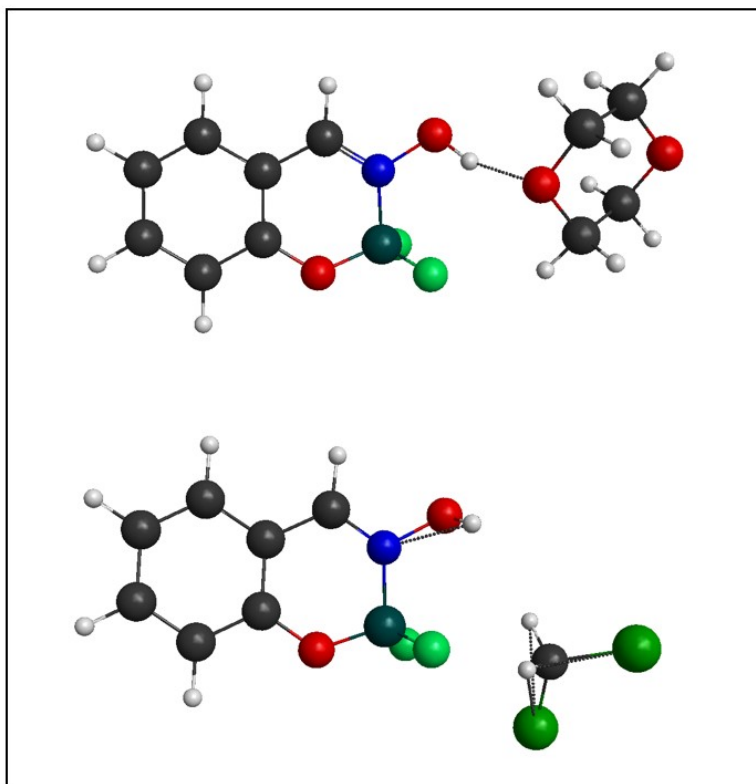

**Figure S16:** DFT geometry optimization results for DFBS using the PCM solvation model and one explicit solvent molecule to better visualize any intermolecular interactions in solution. (Top) DFBS with an explicit dioxane molecule. (Bottom) DFBS with an explicit DCM molecule.

| <b>B3LYP</b>    |        | <b>CAM-B3LYP</b> |        | <b>WB97XD</b>   |        |
|-----------------|--------|------------------|--------|-----------------|--------|
| Absorption (nm) | f      | Absorption (nm)  | f      | Absorption (nm) | f      |
| 262.98          | 0.2740 | 243.74           | 0.2404 | 244.11          | 0.2412 |
| 331.38          | 0.0695 | 299.34           | 0.1109 | 300.33          | 0.1116 |
| Emission (nm)   |        | Emission (nm)    |        | Emission (nm)   |        |
| 419.97          |        | 352.76           |        | 358.90          |        |

**Figure S17:** Gas phase TDDFT results for DFBS utilizing three different exchange functionals. Only the two lowest absorption transition energies are shown. All calculations are performed using Gaussian and the 6-31G(d,p) basis set.

| <b>Experimental Results</b> |                                | <b>B3LYP</b>                         |        | <b>CAM-B3LYP</b>                     |        | <b>WB97XD</b>                        |        |
|-----------------------------|--------------------------------|--------------------------------------|--------|--------------------------------------|--------|--------------------------------------|--------|
| Absorption (nm)             | $\epsilon$ ( $M^{-1}cm^{-1}$ ) | Absorption (nm)<br>Solvent corrected | f      | Absorption (nm)<br>Solvent corrected | f      | Absorption (nm)<br>Solvent corrected | f      |
| 274                         | $1.1 \times 10^4$              | 265.14                               | 0.3757 | 247.35                               | 0.3381 | 247.60                               | 0.3383 |
| 339                         | $3.0 \times 10^3$              | 332.02                               | 0.0861 | 296.37                               | 0.1380 | 297.08                               | 0.1393 |
| Emission (nm)               |                                | Emission (nm)<br>Solvent corrected   |        | Emission (nm)<br>Solvent corrected   |        | Emission (nm)<br>Solvent corrected   |        |
| 440                         |                                | 458.73                               |        | 372.80                               |        | 374.20                               |        |

**Figure S18:** TDDFT results for DFBS in DCM utilizing three different exchange functionals. Only the two lowest absorption transition energies are shown. Only solvent corrected results are shown. All calculations are performed using Gaussian and the 6-31G(d,p) basis set. Results using B3LYP are shown to correlate best with experimental data.
